# Supplementary material
Source: MDPI journal article supplement (https://www.mdpi.com/2073-4352/13/11/1569)
Supplement: s1 [file s1]

## SUPPORTING INFORMATION

# **Kinetic Optimization of the Batch Crystallization of an Active Pharmaceutical Ingredient in the Presence of a Low-Solubility, Precipitating Impurity**

**Mitchell Paolello <sup>1</sup>, Ilyes Bichari <sup>2</sup>, Davinia Brouckaert <sup>2</sup>, Mirvatte Francis <sup>2</sup>, Dawn Yang <sup>2</sup> and Gerard Capellades <sup>1,\*</sup>**

<sup>1</sup> Department of Chemical Engineering, Rowan University, Glassboro, NJ 08028, United States; capellades@rowan.edu

<sup>2</sup> Indatech, Chauvin Arnoux Group, 34830 Clapiers, France

\* Author to whom correspondence should be addressed

### Raman Spectra for Pure Components

The reference Raman spectra were obtained from pure ACM and pure CUR that were suspended in 25/75 EtOH/H<sub>2</sub>O solvent, which was the solvent composition in which both solids were crystallized. In addition, a spectra was taken for the solvent itself. The reference spectra are all illustrated in Figure S1. The solvent peak at 850 cm<sup>-1</sup> is correlated to the liquid phase concentration of ACM. The peak decreases as ACM liquid concentration increases and as ACM crystallizes out. The PLS model is not affected by an increase or decrease in the peak when ACM increases as it correlates this variability to the liquid concentrations directly.

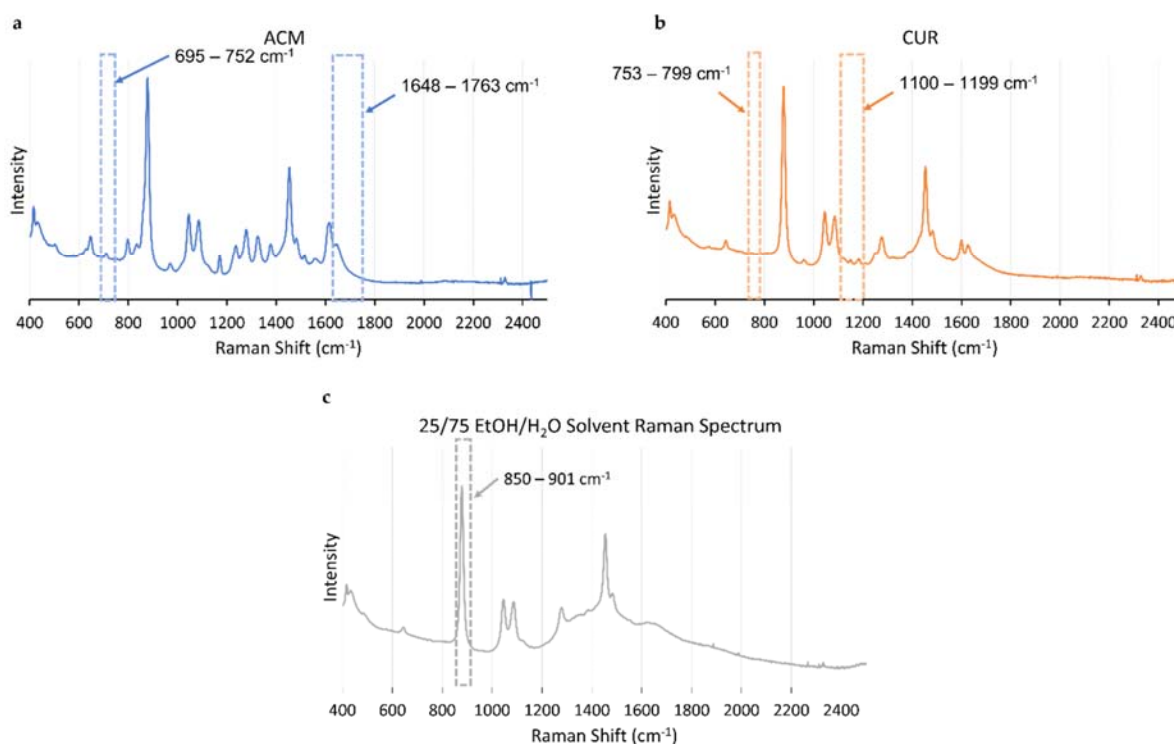

**Figure S1.** Raman spectra for pure ACM (a), pure CUR (b) and the 25/75 EtOH/H<sub>2</sub>O solvent (c).

There is a small band in the solvent spectrum at 1648 cm<sup>-1</sup> (Fig. S1c). A peak is detected at this point in the presence of ACM (Fig. S1a). Although there is a peak for CUR at 1626 cm<sup>-1</sup> (Fig. S1b), CUR is much less concentrated in the liquid phase than ACM and is also close to the ACM peak. The ACM and CUR peaks in this region are dependent on each other since their peaks are closely aligned and have been observed to merge into a single peak. Preprocessing was done as explained in Section 4.1 of the Results to reduce the correlation between the ACM and CUR peaks in this region.

## Particle Size Distributions

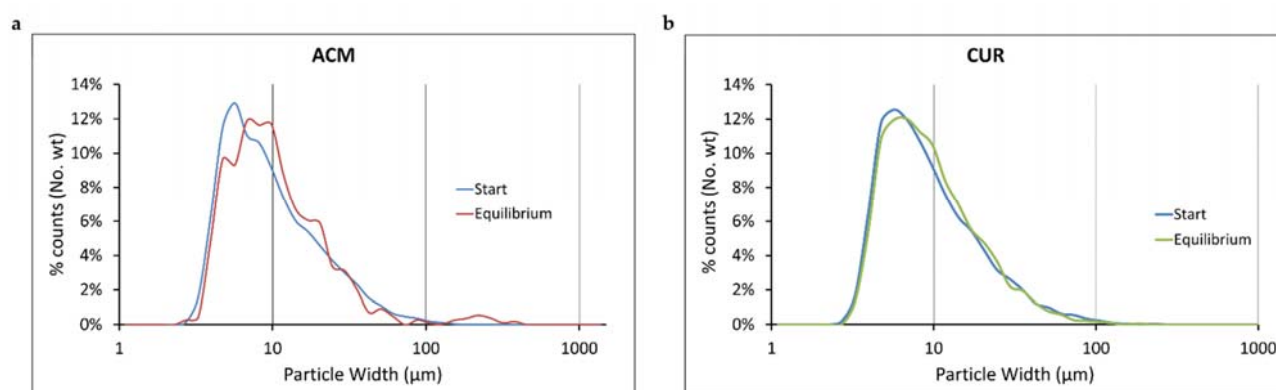

**Figure S2.** Particle width distributions for ACM (a) and CUR (b) indicate little change in the number of small particles between the start of the crystallization and at equilibrium. These observations led to the assumption that secondary nucleation of ACM and CUR is negligible, and the primary kinetic mechanism is growth on the seed crystals.

## **gPROMS Nomenclature for Parameter Estimation Model**

**Table S1.** Model equations for parameter estimation, including equation size for gPROMS FormulatedProducts.

| Description                     | Equation Form                                                                                   | Size |
|---------------------------------|-------------------------------------------------------------------------------------------------|------|
| Total Concentrations            | $C_{tot,i} = C_c P_{c,i} + C_s P_{s,i}$                                                         | NS   |
| Seed Concentrations             | $M_{s,i} = C_s P_{s,i}$                                                                         | NS   |
| Phase Balance                   | $C_{tot,i} = C_{ml,i} + M_{T,i}$                                                                | NS   |
| Supersaturation                 | $\sigma_i = \ln\left(\frac{C_{ml,i}}{C_{sat,i}}\right)$                                         | NS   |
| Nucleation Rate                 | $B_i = k_{b,i} M_{T,i}^{j_i} \sigma_i^{b_i}$                                                    | NS   |
| Growth Rate                     | $G_i = k_{g,i} \sigma_i^{g_i}$                                                                  | NS   |
| Yield, or % Solute Crystallized | $Y_i = \frac{M_{T,i} - M_{s,i}}{C_{tot,i} - M_{s,i}} 100$                                       | NS   |
| % Progress to Equilibrium       | $E_i = \frac{M_{T,i} - M_{s,i}}{C_{tot,i} - M_{s,i} - C_{sat,i}} 100$                           | NS   |
| Product Purity                  | $P_{p,i} = \frac{M_{T,i}}{\sum_{j=NS} M_{T,j}} 100$                                             | NS   |
| First moment                    | $\frac{d\mu_{1,i}}{dt} = G_i \mu_{0,i}$                                                         | NS   |
| Second moment                   | $\frac{d\mu_{2,i}}{dt} = 2G_i \mu_{1,i}$                                                        | NS   |
| Desupersaturation Rate          | $\frac{dC_{ml,i}}{dt} = -3k_{v,i} \rho_i G_i \mu_{2,i} \cdot 10^{-12} \text{ mL}/\mu\text{m}^3$ | NS   |

**Table S2.** Model parameters for the equations in Table S1, as they would be implemented to gPROMS FormulatedProducts.

| Symbol    | Description                                            | Units           | gPROMS Identifier | Size | Type        |
|-----------|--------------------------------------------------------|-----------------|-------------------|------|-------------|
| NS        | System solutes                                         | -               | solutes           | -    | ORDERED_SET |
| $b_i$     | Nucleation rate order for supersaturation, solute i    | -               | b_order           | NS   | REAL        |
| $g_i$     | Growth rate order for supersaturation, solute i        | -               | g_order           | NS   | REAL        |
| $j_i$     | Nucleation rate order for suspension density, solute i | -               | j_order           | NS   | REAL        |
| $k_{b,i}$ | Nucleation rate constant, solute i                     | #/L/s           | nuc_constant      | NS   | REAL        |
| $k_{g,i}$ | Growth rate constant, solute i                         | $\mu\text{m/s}$ | gr_constant       | NS   | REAL        |
| $k_{v,i}$ | Crystal volumetric shape factor, solute i              | -               | V_shape_factor    | NS   | REAL        |
| $\rho_i$  | Density of the crystalline solute, solute i            | g/mL            | density           | NS   | REAL        |

**Table S3.** Model variables for the equations in Table S1, as they would be implemented to gPROMS FormulatedProducts.

Assigned variables    Supplied during parameter estimation, with initial conditions

| Symbol      | Description                                     | Units           | gPROMS Identifier    | Size | Type              |
|-------------|-------------------------------------------------|-----------------|----------------------|------|-------------------|
| $B_i$       | Nucleation rate, solute i                       | $L^{-1} s^{-1}$ | rate_nucleation      | NS   | nucleation_rate   |
| $C_c$       | Mass fraction of crude in the starting solution | g/L             | crude_conc           | -    | concentration     |
| $C_{ml,i}$  | Mass fraction of solute i in the mother liquor  | g/L             | ml_conc              | NS   | concentration     |
| $C_s$       | Mass fraction of seeds in the system            | g/L             | seeds_conc_total     | -    | concentration     |
| $C_{sat,i}$ | Solubility of solute i                          | g/L             | solubility           | NS   | concentration     |
| $C_{tot,i}$ | Mass fraction of solute i in the system         | g/L             | total_conc           | NS   | concentration     |
| $E_i$       | Percent progress to equilibrium, solute i       | %               | progress             | NS   | yield             |
| $G_i$       | Linear crystal growth rate, solute i            | $\mu m/s$       | rate_growth          | NS   | growth_rate       |
| $M_{s,i}$   | Seed solids concentration, solute i             | g/L             | seeds_conc_component | NS   | concentration     |
| $M_{T,i}$   | Total solids concentration, solute i            | g/L             | solids_conc          | NS   | concentration     |
| $P_{c,i}$   | Crude purity for solute i                       | g/g             | crude_purity         | NS   | mass_fraction_gFP |
| $P_{p,i}$   | Product purity for solute i                     | %               | product_purity       | NS   | purity            |
| $P_{s,i}$   | Seed purity for solute i                        | g/g             | seed_purity          | NS   | mass_fraction_gFP |
| $Y_i$       | Yield for solute i                              | %               | yield                | NS   | yield             |
| $\sigma_i$  | Supersaturation for solute i                    | -               | supersaturation      | NS   | supersaturation   |
| $\mu_{0,i}$ | zeroth moment solute i                          | $L^{-1}$        | zeroth_moment        | NS   | zeroth_moment     |
| $\mu_{1,i}$ | 1st moment solute i                             | $\mu m/L$       | first_moment         | NS   | first_moment      |
| $\mu_{2,i}$ | 2nd moment solute i                             | $\mu m^2/L$     | second_moment        | NS   | second_moment     |
